# Supplementary material for: Developmental stage of transplanted neural progenitor cells influences anatomical and functional outcomes after spinal cord injury in mice
Source: PubMed Central journal article supplement (PMC10199026; doi:10.1038/s42003-023-04893-0), 2023-05-19
Supplement: 42003_2023_4893_MOESM2_ESM.pdf [file 42003_2023_4893_MOESM2_ESM.pdf]

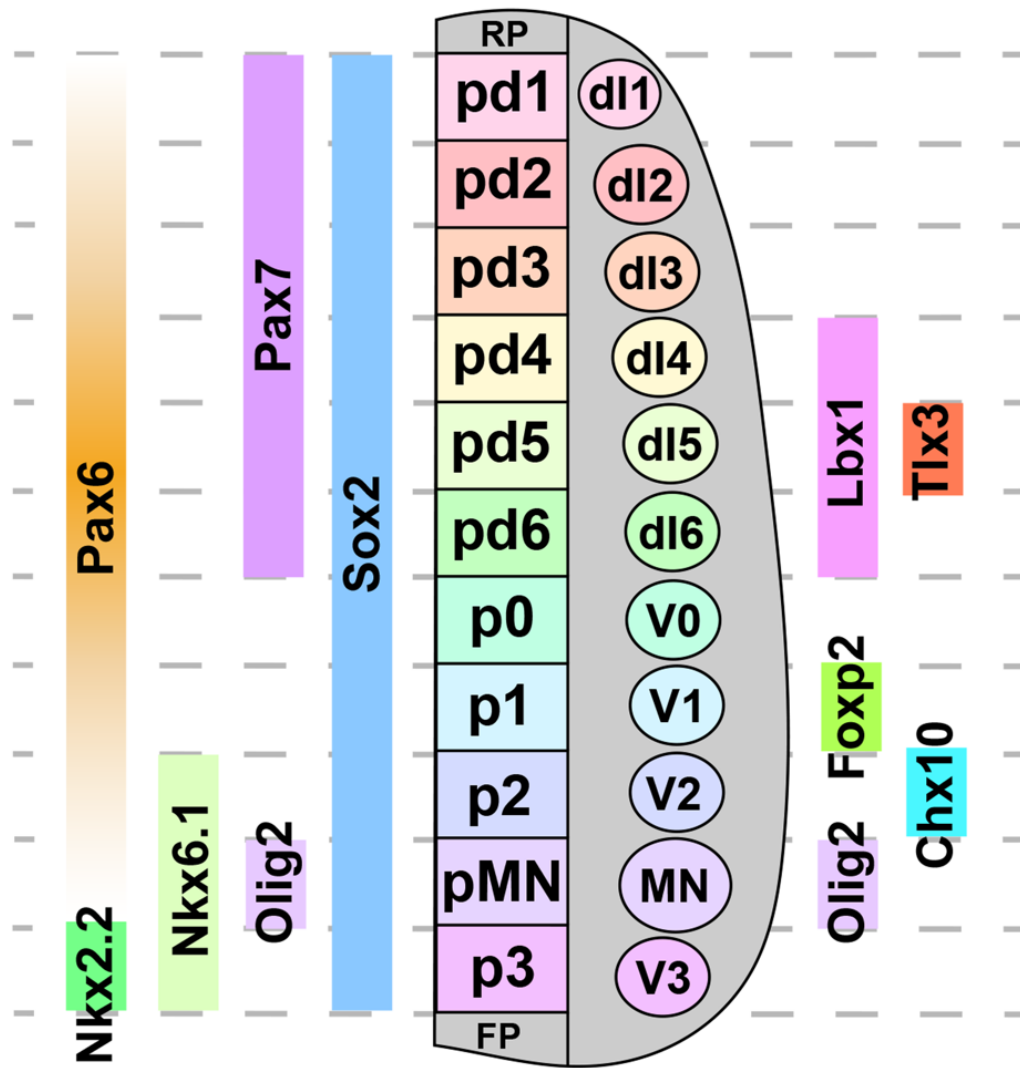

**Supplementary Figure 1. Diagram of transcription factors expressed in progenitors and postmitotic neurons in the developing spinal cord.** Illustration shows selected transcription factors that are expressed in spinal cord neural tube progenitor domains (left side; pd1 – p3) or in postmitotic neurons (right side; dl1 – V3). Note that Chx10 is only expressed in the V2a subset of V2 interneurons. RP = roof plate, FP = floor plate. This figure is based on an existing body of knowledge about the transcriptional control of spinal cord specification<sup>1-4</sup>.

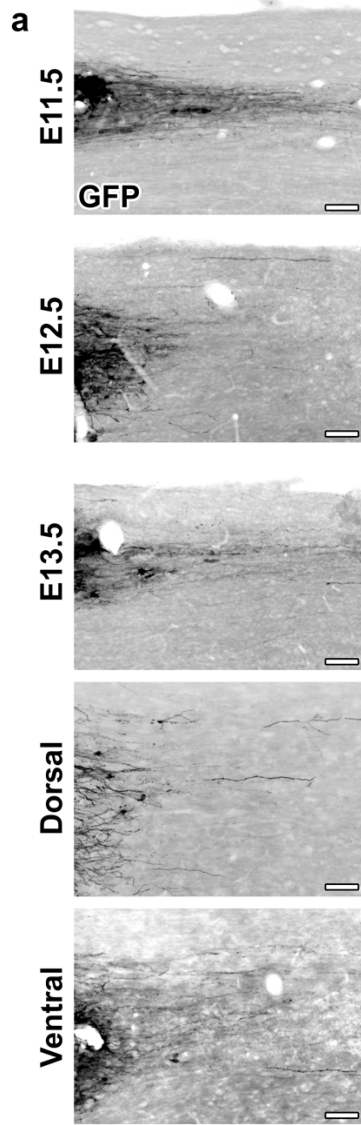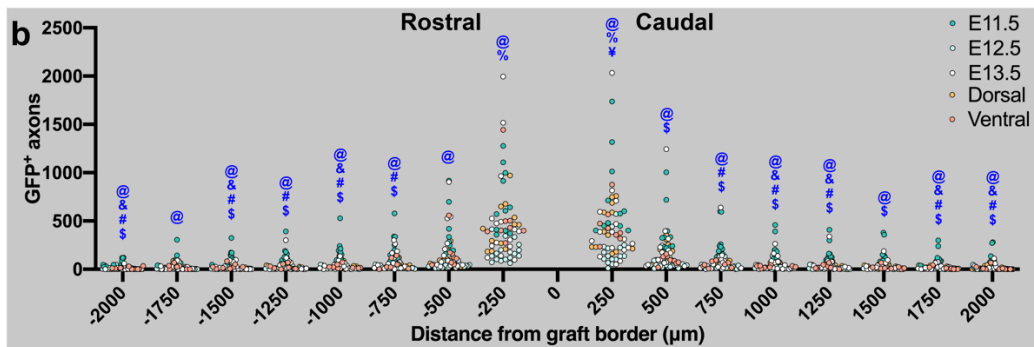

**Supplementary Figure 2. Axon outgrowth from GFP<sup>+</sup> NPC grafts.** (a) All images are GFP<sup>+</sup> NPC grafts at 4 weeks post-transplantation into sites of cervical SCI. Scale bars = 100 µm. (b) Individual data points for the data in Figure 2i.

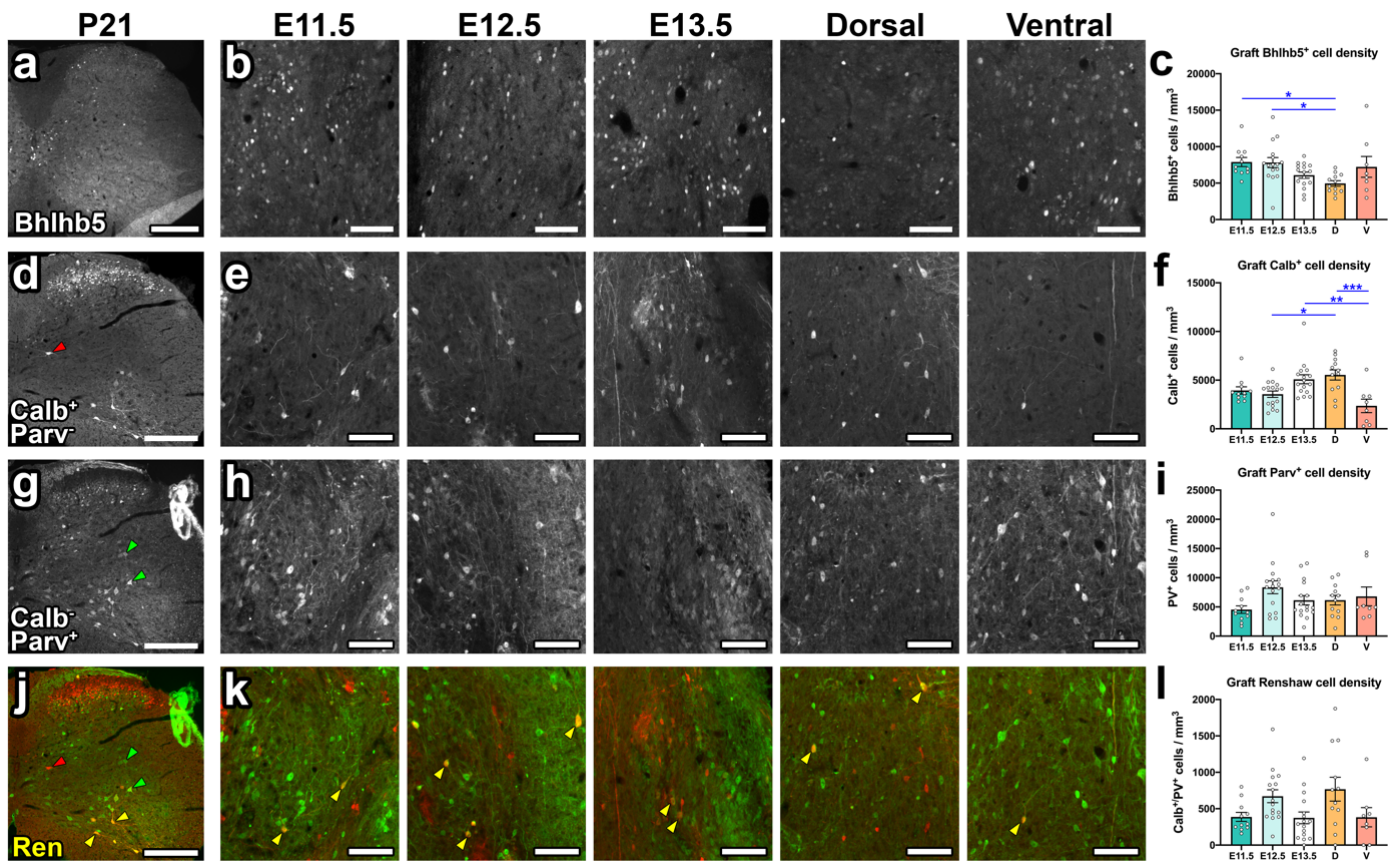

**Supplementary Figure 3. Some graft interneuron populations do not vary in abundance with developmental stage of donor NPCs.** (a, d, g, j) Distribution of cell type-specific markers in intact P21 mouse spinal cord. (b, e, h, k) Images of NPC grafts at 4 weeks post-transplantation into sites of cervical SCI. Images within the same column in rows e, h, and e are different fluorescent channels of the same tissue section. (c, f, i, l) Quantification of the abundance of (c) Bhlhb5<sup>+</sup>, (f) Calb<sup>+</sup>/Parv<sup>-</sup>, (i) Parv<sup>+</sup>/Calb<sup>-</sup>, and (l) Calb<sup>+</sup>/Parv<sup>+</sup> Renshaw interneurons in rat NPC grafts. \*P<0.05, \*\*P<0.01, \*\*\*P<0.001 by one-way ANOVA with Tukey's multiple comparisons test. E11.5 (n=11); E12.5 (n=16); E13.5 (n=16); dorsal (n=12); ventral (n=8). All data are mean ± SEM. Scale bars = 250 μm (a, d, g, j); 100 μm (b, e, h, k).

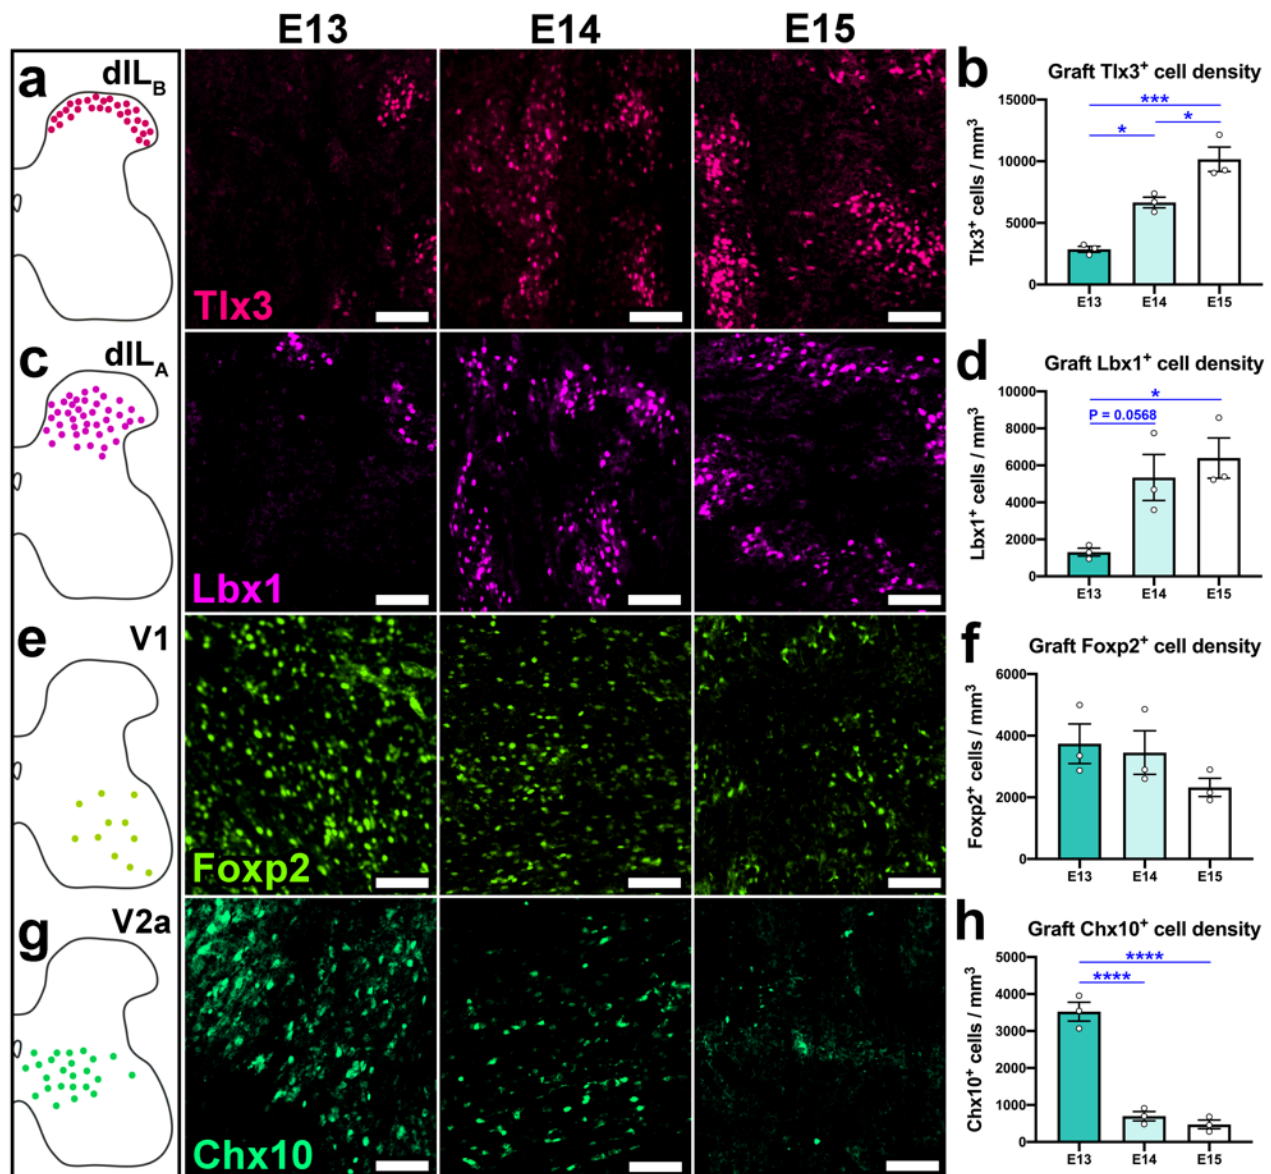

**Supplementary Figure 4. Dorsal and ventral spinal cord interneuron populations vary with developmental stage of donor rat neural progenitor cells.** (a, c, e, g) Images of cell type-specific markers in rat NPC grafts at 4 weeks following transplantation into the injured adult rat cervical spinal cord. Cartoons represent the spatial distribution of each neuronal cell type in the postnatal rat spinal cord. (b, d, f, h) Quantification of the abundance of (b) Tlx3<sup>+</sup>, (d) Lbx1<sup>+</sup>, (f) Foxp2<sup>+</sup>, and (h) Chx10<sup>+</sup> interneurons in rat NPC grafts. \*P<0.05, \*\*\*P<0.001, \*\*\*\*P<0.0001 by one-way ANOVA with Tukey's multiple comparisons test. E13 (n=3 mice), E14 (n=3 mice), E15 (n=3 mice). All data are mean ± SEM. Scale bars = 100 μm.

**Supplementary Table 1. Primary and secondary antibodies used in this study.**

| <b>Antibody</b>                                   | <b>Catalog #</b>                               | <b>RRID</b> | <b>Dilution</b> |
|---------------------------------------------------|------------------------------------------------|-------------|-----------------|
| <b>Primary antibodies</b>                         |                                                |             |                 |
| Rabbit anti-5-HT                                  | ImmunoStar #20080                              | AB_572263   | 1:20,000        |
| Rabbit anti-Bhlhb5                                | Gift of Dr. Sarah Ross                         | Not listed  | 1:1,000         |
| Mouse anti-Brn3a                                  | Millipore #MAB1585                             | AB_94166    | 1:200           |
| Chicken anti-Calbindin                            | EnCor #CPCA-Calb                               | AB_2572237  | 1:200           |
| Goat anti-CGRP                                    | Abcam #ab36001                                 | AB_725807   | 1:1,000         |
| Goat anti-ChAT                                    | Genetex #GTX82725                              | AB_11162364 | 1:200           |
| Sheep anti-Chx10                                  | Abcam #ab16141                                 | AB_302278   | 1:200           |
| Rabbit anti-Foxp2                                 | Abcam #ab16046                                 | AB_2107107  | 1:200           |
| Chicken anti-GFP                                  | Aves #GFP-1020                                 | AB_10000240 | 1:1,500         |
| Goat anti-GFP                                     | Rockland #600-101-215                          | AB_218182   | 1:1,500         |
| Rabbit anti-GFP                                   | Thermo Fisher Scientific #A-11122              | AB_221569   | 1:200           |
| Guinea pig anti-Lbx1                              | Gift of Drs. Carmen Birchmeier & Thomas Müller | AB_2532144  | 1:20,000        |
| Goat anti-mCherry                                 | Sicgen #AB0040-200                             | AB_2333093  | 1:1,000         |
| Guinea pig anti-NeuN                              | Millipore #ABN90                               | AB_11205592 | 1:2,000         |
| Mouse anti-NeuN                                   | Biologend #834501                              | AB_2564991  | 1:200           |
| Rabbit anti-Nfib                                  | Sigma #HPA 003956                              | AB_1854424  | 1:1,600         |
| Mouse anti-Nkx2.2                                 | DSHB #74.5A5                                   | AB_531794   | 1:50            |
| Mouse anti-Nkx6.1                                 | DSHB #F55A12                                   | AB_532379   | 1:50            |
| Rabbit anti-Olig2                                 | Millipore #AB9610                              | AB_570666   | 1:200           |
| Rabbit anti-Parvalbumin                           | Swant #PV27                                    | AB_2631173  | 1:200           |
| Rabbit anti-Pax6                                  | Biologend #901301                              | AB_2565003  | 1:50            |
| Mouse anti-Pax7                                   | DSHB #Pax7                                     | AB_528428   | 1:50            |
| Rabbit anti-Sox2                                  | Abcam #ab97959                                 | AB_2341193  | 1:200           |
| Goat anti-Sox9                                    | R&D Systems #AF3075                            | AB_2194160  | 1:200           |
| Rabbit anti-Sox9                                  | Abcam #ab185966                                | AB_2728660  | 1:2,000         |
| Rabbit anti-Tlx3                                  | Gift of Drs. Carmen Birchmeier & Thomas Müller | AB_2532145  | 1:10,000        |
| Rabbit anti-Zfhx4                                 | Sigma #HPA 023837                              | AB_1859013  | 1:100           |
| <b>Secondary antibodies</b>                       |                                                |             |                 |
| AlexaFluor 488 Affinipure donkey anti-chicken IgY | Jackson ImmunoResearch #703-545-155            | AB_2340375  | 1:1,000         |
| Cy3 Affinipure donkey anti-chicken IgY            | Jackson ImmunoResearch #703-165-155            | AB_2340363  | 1:1,000         |
| AlexaFluor 647 Affinipure donkey anti-chicken IgY | Jackson ImmunoResearch #703-605-155            | AB_2340379  | 1:1,000         |
| AlexaFluor 488 Affinipure donkey anti-goat IgG    | Jackson ImmunoResearch #705-545-147            | AB_2336933  | 1:1,000         |
| Cy3 Affinipure donkey anti-goat IgG               | Jackson ImmunoResearch #705-165-147            | AB_2307351  | 1:1,000         |
| AlexaFluor 647 Affinipure donkey anti-goat IgG    | Jackson ImmunoResearch #705-605-147            | AB_2340437  | 1:1,000         |

|                                                      |                                     |            |         |
|------------------------------------------------------|-------------------------------------|------------|---------|
| AlexaFluor 488 Affinipure donkey anti-guinea pig IgG | Jackson ImmunoResearch #706-545-148 | AB_2340472 | 1:1,000 |
| AlexaFluor 647 Affinipure donkey anti-guinea pig IgG | Jackson ImmunoResearch #706-605-148 | AB_2340476 | 1:1,000 |
| AlexaFluor 488 Affinipure donkey anti-mouse IgG      | Jackson ImmunoResearch #715-545-150 | AB_2340846 | 1:1,000 |
| Cy3 Affinipure donkey anti-mouse IgG                 | Jackson ImmunoResearch #715-165-150 | AB_2340813 | 1:1,000 |
| Alexa Fluor Plus 555 donkey anti-mouse IgG           | Thermo Fisher Scientific #A32773    | AB_2762848 | 1:200   |
| AlexaFluor 647 Affinipure donkey anti-mouse IgG      | Jackson ImmunoResearch #715-605-150 | AB_2340862 | 1:1,000 |
| AlexaFluor 488 Affinipure donkey anti-rabbit IgG     | Jackson ImmunoResearch #711-545-152 | AB_2313584 | 1:1,000 |
| Alexa Fluor Plus 488 donkey anti-rabbit IgG          | Thermo Fisher Scientific #A32790    | AB_2762833 | 1:200   |
| Cy3 Affinipure donkey anti-rabbit IgG                | Jackson ImmunoResearch #711-165-152 | AB_2307443 | 1:1,000 |
| AlexaFluor 647 Affinipure donkey anti-rabbit IgG     | Jackson ImmunoResearch #711-605-152 | AB_2492288 | 1:1,000 |
| Cy3 Affinipure donkey anti-sheep IgG                 | Jackson ImmunoResearch #713-165-003 | AB_2340727 | 1:1,000 |
| AlexaFluor Affinipure 647 donkey anti-sheep IgG      | Jackson ImmunoResearch #713-605-003 | AB_2340750 | 1:1,000 |



**Supplementary Table 2. Detailed description of statistical analyses used in this study.**

| <b>Fig.</b> | <b>Parameter</b>                                          | <b>Group size (n)</b>                                   | <b>Statistical test</b>                                       | <b>Significance level</b>                                                                   |
|-------------|-----------------------------------------------------------|---------------------------------------------------------|---------------------------------------------------------------|---------------------------------------------------------------------------------------------|
| 1c          | Percent Sox2 <sup>+</sup> cells (24 h)                    | E11.5 (n=4 wells); E12.5 (n=5 wells); E13.5 (n=7 wells) | Ordinary one-way ANOVA with Tukey's multiple comparisons test | F (2, 13) = 4.883; P = 0.0262<br>E11.5 vs. E13.5: P = 0.0227                                |
| 1d          | Percent Olig2 <sup>+</sup> cells (24 h)                   | E11.5 (n=4 wells); E12.5 (n=6 wells); E13.5 (n=7 wells) | Ordinary one-way ANOVA with Tukey's multiple comparisons test | F (2, 14) = 4.012; P = 0.0419<br>No significant differences among groups                    |
| 1e          | Percent Pax6 <sup>+</sup> /Pax7 <sup>-</sup> cells (24 h) | E11.5 (n=4 wells); E12.5 (n=6 wells); E13.5 (n=6 wells) | Ordinary one-way ANOVA with Tukey's multiple comparisons test | F (2, 13) = 122.2; P < 0.0001<br>E11.5 vs. E12.5: P < 0.0001<br>E11.5 vs. E13.5: P < 0.0001 |
| 1f          | Percent Pax7 <sup>+</sup> cells (24 h)                    | E11.5 (n=4 wells); E12.5 (n=6 wells); E13.5 (n=6 wells) | Ordinary one-way ANOVA with Tukey's multiple comparisons test | F (2, 13) = 0.1213; P = 0.8868<br>No significant differences among groups                   |
| 1g          | Percent Nkx2.2 <sup>+</sup> cells (24 h)                  | E11.5 (n=4 wells); E12.5 (n=6 wells); E13.5 (n=6 wells) | Ordinary one-way ANOVA with Tukey's multiple comparisons test | F (2, 13) = 4.124; P = 0.0410<br>E11.5 vs. E13.5: P = 0.0364                                |
| 1h          | Percent Nkx6.1 <sup>+</sup> cells (24 h)                  | E11.5 (n=4 wells); E12.5 (n=6 wells); E13.5 (n=7 wells) | Ordinary one-way ANOVA with Tukey's multiple comparisons test | F (2, 14) = 3.127; P = 0.0754<br>No significant differences among groups                    |
| 1i          | Percent NeuN <sup>+</sup> cells (72 h)                    | E11.5 (n=4 wells); E12.5 (n=9 wells); E13.5 (n=6 wells) | Ordinary one-way ANOVA with Tukey's multiple comparisons test | F (2, 16) = 0.1832; P = 0.8343<br>No significant differences among groups                   |
| 1j          | Percent Sox9 <sup>+</sup> cells (72 h)                    | E11.5 (n=4 wells); E12.5 (n=6 wells); E13.5 (n=5 wells) | Ordinary one-way ANOVA with Tukey's multiple comparisons test | F (2, 12) = 3.184; P 0.0778<br>No significant differences among groups                      |
| 1k          | Percent Olig2 <sup>+</sup> cells (72 h)                   | E11.5 (n=4 wells); E12.5 (n=9 wells); E13.5 (n=6 wells) | Ordinary one-way ANOVA with Tukey's multiple comparisons test | F (2, 16) = 0.9079; P = 0.4232<br>No significant differences among groups                   |
| 1l          | Percent Sox2 <sup>+</sup> cells (72 h)                    | E11.5 (n=4 wells); E12.5 (n=6 wells); E13.5 (n=7 wells) | Ordinary one-way ANOVA with Tukey's multiple comparisons test | F (2, 14) = 0.2965; P = 0.7479<br>No significant differences among groups                   |
| 1m          | Percent Lbx1 <sup>+</sup> cells (72 h)                    | E11.5 (n=4 wells); E12.5                                | Ordinary one-way ANOVA with                                   | F (2, 14) = 7.669; P = 0.0056                                                               |

|    |                                         |                                                                        |                                                                        |                                                                                                                                                                                                                                                                                                                                                                                                                                                                                                                                |
|----|-----------------------------------------|------------------------------------------------------------------------|------------------------------------------------------------------------|--------------------------------------------------------------------------------------------------------------------------------------------------------------------------------------------------------------------------------------------------------------------------------------------------------------------------------------------------------------------------------------------------------------------------------------------------------------------------------------------------------------------------------|
|    |                                         | (n=6 wells);<br>E13.5 (n=7 wells)                                      | Tukey's multiple comparisons test                                      | E11.5 vs. E13.5: P = 0.0394<br>E12.5 vs. E13.5: P = 0.0066                                                                                                                                                                                                                                                                                                                                                                                                                                                                     |
| 1n | Percent Tlx3 <sup>+</sup> cells (72 h)  | E11.5 (n=4 wells); E12.5 (n=6 wells); E13.5 (n=5 wells)                | Ordinary one-way ANOVA with Tukey's multiple comparisons test          | F (2, 12) = 3.014; P = 0.0870<br><br>No significant differences among groups                                                                                                                                                                                                                                                                                                                                                                                                                                                   |
| 1o | Percent Chx10 <sup>+</sup> cells (72 h) | E11.5 (n=4 wells); E12.5 (n=6 wells); E13.5 (n=7 wells)                | Ordinary one-way ANOVA with Tukey's multiple comparisons test          | F (2, 14) = 37.39; P < 0.0001<br><br>E11.5 vs. E12.5: P < 0.0001<br>E11.5 vs. E13.5: P < 0.0001                                                                                                                                                                                                                                                                                                                                                                                                                                |
| 1p | Percent Foxp2 <sup>+</sup> cells (72 h) | E11.5 (n=4 wells); E12.5 (n=6 wells); E13.5 (n=7 wells)                | Ordinary one-way ANOVA with Tukey's multiple comparisons test          | F (2, 14) = 15.44; P = 0.0003<br><br>E11.5 vs. E12.5: P = 0.0025<br>E11.5 vs. E13.5: P = 0.0002                                                                                                                                                                                                                                                                                                                                                                                                                                |
| 2d | Graft neuron density                    | E11.5 (n=11); E12.5 (n=16); E13.5 (n=16); dorsal (n=12); ventral (n=8) | Ordinary one-way ANOVA with Tukey's multiple comparisons test          | F (4, 58) = 9.818; P < 0.0001<br><br>E11.5 vs. E12.5: P = 0.0039<br>E11.5 vs. dorsal: P < 0.0001<br>E11.5 vs. ventral: P = 0.0068<br>E13.5 vs. dorsal: P = 0.0009                                                                                                                                                                                                                                                                                                                                                              |
| 2f | Graft astrocyte density                 | E11.5 (n=11); E12.5 (n=16); E13.5 (n=16); dorsal (n=12); ventral (n=8) | Ordinary one-way ANOVA with Tukey's multiple comparisons test          | F (4, 58) = 5.214; P = 0.0012<br><br>E11.5 vs. ventral: P = 0.0370<br>E12.5 vs. dorsal: P = 0.0156<br>E12.5 vs. ventral: P = 0.0020                                                                                                                                                                                                                                                                                                                                                                                            |
| 2h | Graft oligodendrocyte density           | E11.5 (n=11); E12.5 (n=16); E13.5 (n=15); dorsal (n=12); ventral (n=8) | Ordinary one-way ANOVA with Tukey's multiple comparisons test          | F (4, 57) = 2.974; P = 0.0267<br><br>E12.5 vs. ventral: P = 0.0322                                                                                                                                                                                                                                                                                                                                                                                                                                                             |
| 2i | Graft axon outgrowth                    | E11.5 (n=11); E12.5 (n=16); E13.5 (n=16); dorsal (n=12); ventral (n=8) | Two-way repeated measures ANOVA with Tukey's multiple comparisons test | Distance x Treatment main effect: F (60, 870) = 3.242, P < 0.0001<br>Distance main effect: F (1.393, 80.79) = 88.77, P < 0.0001<br>Treatment main effect: F (4, 58) = 8.305, P < 0.0001<br>Subject main effect: F (58, 870) = 10.85, P < 0.0001<br><br>-2000 μm:<br>E11.5 vs. E12.5: P = 0.0009<br>E11.5 vs. E13.5: P = 0.0010<br>E11.5 vs. dorsal: P = 0.0009<br>E11.5 vs. ventral: P = 0.0020<br><br>-1750 μm:<br>E11.5 vs. E12.5: P = 0.0217<br><br>-1500 μm:<br>E11.5 vs. E12.5: P = 0.0027<br>E11.5 vs. E13.5: P = 0.0079 |



E11.5 vs. dorsal: P = 0.0039  
E11.5 vs. ventral: P = 0.0092

-1250  $\mu\text{m}$ :  
E11.5 vs. E12.5: P = 0.0075  
E11.5 vs. dorsal: P = 0.0132  
E11.5 vs. ventral: P = 0.0154

-1000  $\mu\text{m}$ :  
E11.5 vs. E12.5: P = 0.0082  
E11.5 vs. E13.5: P = 0.0161  
E11.5 vs. dorsal: P = 0.0149  
E11.5 vs. ventral: P = 0.0112

-750  $\mu\text{m}$ :  
E11.5 vs. E12.5: P = 0.0070  
E11.5 vs. dorsal: P = 0.0192  
E11.5 vs. ventral: P = 0.0180

-500  $\mu\text{m}$ :  
E11.5 vs. E12.5: P = 0.0167

-250  $\mu\text{m}$ :  
E11.5 vs. E12.5: P = 0.0024  
E12.5 vs. dorsal: P = 0.0213

+250  $\mu\text{m}$ :  
E11.5 vs. E12.5: P = 0.0121  
E12.5 vs. dorsal: P = 0.0386  
E12.5 vs. ventral: P = 0.0391

+500  $\mu\text{m}$ :  
E11.5 vs. E12.5: P = 0.0116  
E11.5 vs. ventral: P = 0.0247

+750  $\mu\text{m}$ :  
E11.5 vs. E12.5: P = 0.0055  
E11.5 vs. dorsal: P = 0.221  
E11.5 vs. ventral: P = 0.0105

+1000  $\mu\text{m}$ :  
E11.5 vs. E12.5: P = 0.0048  
E11.5 vs. E13.5: P = 0.0290  
E11.5 vs. dorsal: P = 0.0117  
E11.5 vs. ventral: P = 0.0059

+1250  $\mu\text{m}$ :  
E11.5 vs. E12.5: P = 0.0041  
E11.5 vs. E13.5: P = 0.0291  
E11.5 vs. dorsal: P = 0.0086  
E11.5 vs. ventral: P = 0.0056

+1500  $\mu\text{m}$ :  
E11.5 vs. E12.5: P = 0.0282  
E11.5 vs. ventral: P = 0.0317

|    |                                                        |                                                                                    |                                                               |                                                                                                                                                                                                                                                                                                                                                             |
|----|--------------------------------------------------------|------------------------------------------------------------------------------------|---------------------------------------------------------------|-------------------------------------------------------------------------------------------------------------------------------------------------------------------------------------------------------------------------------------------------------------------------------------------------------------------------------------------------------------|
|    |                                                        |                                                                                    |                                                               | <p>+1750 <math>\mu\text{m}</math>:<br/> E11.5 vs. E12.5: P = 0.0091<br/> E11.5 vs. E13.5: P = 0.0135<br/> E11.5 vs. dorsal: P = 0.0152<br/> E11.5 vs. ventral: P = 0.0082</p> <p>+2000 <math>\mu\text{m}</math>:<br/> E11.5 vs. E12.5: P = 0.0046<br/> E11.5 vs. E13.5: P = 0.0093<br/> E11.5 vs. dorsal: P = 0.0093<br/> E11.5 vs. ventral: P = 0.0074</p> |
| 3c | Graft Tlx3 <sup>+</sup> cell density                   | E11.5 (n=11);<br>E12.5 (n=16);<br>E13.5 (n=16);<br>dorsal (n=12);<br>ventral (n=8) | Ordinary one-way ANOVA with Tukey's multiple comparisons test | <p>F (4, 58) = 18.27; P &lt; 0.0001</p> <p>E11.5 vs. E12.5: P = 0.0211<br/> E11.5 vs. E13.5: P &lt; 0.0001<br/> E11.5 vs. dorsal: P = 0.0071<br/> E12.5 vs. E13.5: P = 0.0048<br/> E12.5 vs. ventral: P = 0.0004<br/> E13.5 vs. ventral: P &lt; 0.0001<br/> Dorsal vs. ventral: P = 0.0001</p>                                                              |
| 3f | Graft Lbx1 <sup>+</sup> cell density                   | E11.5 (n=11);<br>E12.5 (n=16);<br>E13.5 (n=16);<br>dorsal (n=12);<br>ventral (n=8) | Ordinary one-way ANOVA with Tukey's multiple comparisons test | <p>F (4, 58) = 27.24; P &lt; 0.0001</p> <p>E11.5 vs. E12.5: P = 0.0027<br/> E11.5 vs. E13.5: P &lt; 0.0001<br/> E11.5 vs. dorsal: P = 0.0152<br/> E12.5 vs. E13.5: P &lt; 0.0001<br/> E12.5 vs. ventral: P = 0.0001<br/> E13.5 vs. dorsal: P &lt; 0.0001<br/> E13.5 vs. ventral: P &lt; 0.0001<br/> Dorsal vs. ventral: P = 0.0008</p>                      |
| 3i | Percent graft calbindin <sup>+</sup> cell cluster area | E11.5 (n=11);<br>E12.5 (n=16);<br>E13.5 (n=16);<br>dorsal (n=12);<br>ventral (n=8) | Ordinary one-way ANOVA with Tukey's multiple comparisons test | <p>F (4, 58) = 22.25; P &lt; 0.0001</p> <p>E11.5 vs. E12.5: P = 0.0063<br/> E11.5 vs. E13.5: P &lt; 0.0001<br/> E11.5 vs. dorsal: P = 0.0021<br/> E12.5 vs. E13.5: P = 0.0011<br/> E12.5 vs. ventral: P = 0.0001<br/> E13.5 vs. dorsal: P = 0.0191<br/> E13.5 vs. ventral: P &lt; 0.0001<br/> Dorsal vs. ventral: P &lt; 0.0001</p>                         |
| 3l | Graft Brn3a <sup>+</sup> cell density                  | E11.5 (n=11);<br>E12.5 (n=16);<br>E13.5 (n=15);<br>dorsal (n=12);<br>ventral (n=8) | Ordinary one-way ANOVA with Tukey's multiple comparisons test | <p>F (4, 57) = 5.686; P = 0.0006</p> <p>E12.5 vs. ventral: P = 0.0011<br/> Dorsal vs. ventral: P = 0.0010</p>                                                                                                                                                                                                                                               |
| 3o | Graft Foxp2 <sup>+</sup> cell density                  | E11.5 (n=11);<br>E12.5 (n=16);<br>E13.5 (n=16);<br>dorsal (n=12);<br>ventral (n=8) | Ordinary one-way ANOVA with Tukey's multiple comparisons test | <p>F (4, 58) = 8.134; P &lt; 0.0001</p> <p>E12.5 vs. E13.5: P = 0.0004<br/> E12.5 vs. dorsal: P = 0.0001<br/> Dorsal vs. ventral: P = 0.0311</p>                                                                                                                                                                                                            |
| 3r | Graft Chx10 <sup>+</sup> cell density                  | E11.5 (n=11);<br>E12.5 (n=16);<br>E13.5 (n=16);<br>dorsal (n=12);<br>ventral (n=8) | Ordinary one-way ANOVA with Tukey's multiple comparisons test | <p>F (4, 58) = 4.083; P = 0.0055</p> <p>E13.5 vs. ventral: P = 0.0434<br/> Dorsal vs. ventral: P = 0.0033</p>                                                                                                                                                                                                                                               |

|    |                                                                               |                                                                        |                                                                                                 |                                                                                                                                                                                  |
|----|-------------------------------------------------------------------------------|------------------------------------------------------------------------|-------------------------------------------------------------------------------------------------|----------------------------------------------------------------------------------------------------------------------------------------------------------------------------------|
| 4c | Chx10-cre::Ai14 graft V2a neuron density                                      | E11.5 (n=7); E12.5 (n=6); E13.5 (n=8)                                  | Ordinary one-way ANOVA with Tukey's multiple comparisons test                                   | F (2, 18) = 7.243; P = 0.0049<br>E11.5 vs. E12.5: P = 0.0155;<br>E11.5 vs. E13.5: P = 0.0078                                                                                     |
| 4e | Chx10-cre::Ai14 graft Nfib <sup>+</sup> cell density                          | E11.5 (n=7); E12.5 (n=5); E13.5 (n=8)                                  | Ordinary one-way ANOVA with Tukey's multiple comparisons test                                   | F (2, 17) = 15.01; P = 0.0002<br>E11.5 vs. E13.5: P = 0.0001<br>E12.5 vs. E13.5: P = 0.0340                                                                                      |
| 4f | Chx10-cre::Ai14 graft tdTomato <sup>+</sup> / Nfib <sup>+</sup> cell density  | E11.5 (n=7); E12.5 (n=5); E13.5 (n=8)                                  | Ordinary one-way ANOVA with Tukey's multiple comparisons test                                   | F (2, 17) = 0.005486; P = 0.9945<br>No significant differences among groups                                                                                                      |
| 4h | Chx10-cre::Ai14 graft Zfhx4 <sup>+</sup> cell density                         | E11.5 (n=7); E12.5 (n=4); E13.5 (n=7)                                  | Ordinary one-way ANOVA with Tukey's multiple comparisons test                                   | F (2, 15) = 15.19; P = 0.0002<br>E11.5 vs. E12.5: P = 0.0230<br>E11.5 vs. E13.5: P = 0.0002                                                                                      |
| 4i | Chx10-cre::Ai14 graft tdTomato <sup>+</sup> / Zfhx4 <sup>+</sup> cell density | E11.5 (n=7); E12.5 (n=4); E13.5 (n=7)                                  | Ordinary one-way ANOVA with Tukey's multiple comparisons test                                   | F (2, 15) = 6.234; P = 0.0107<br>E11.5 vs. E13.5: P = 0.0105                                                                                                                     |
| 5c | Regeneration of 5-HT <sup>+</sup> axons in grafts                             | E11.5 (n=11); E12.5 (n=16); E13.5 (n=16); dorsal (n=12); ventral (n=8) | Ordinary one-way ANOVA with Tukey's multiple comparisons test                                   | F (4, 58) = 11.11; P < 0.0001<br>E11.5 vs. E12.5: P < 0.0001<br>E11.5 vs. E13.5: P = 0.0002<br>E11.5 vs. dorsal: P < 0.0001                                                      |
| 5d | Regeneration of CGRP <sup>+</sup> axons in grafts                             | E11.5 (n=11); E12.5 (n=16); E13.5 (n=16); dorsal (n=12); ventral (n=8) | Ordinary one-way ANOVA with Tukey's multiple comparisons test                                   | F (4, 58) = 4.277, P = 0.0042<br>E11.5 vs. E13.5: P = 0.0380<br>E12.5 vs. E13.5: P = 0.0053<br>E13.5 vs. ventral: P = 0.0475                                                     |
| 6b | Contusion displacement scores                                                 | Vehicle (n=10); E11.5 (n=10); E12.5 (n=10), E13.5 (n=7)                | Ordinary one-way ANOVA with Tukey's multiple comparisons test                                   | F (3, 33) = 1.410, P = 0.2574<br>No significant differences among groups                                                                                                         |
| 6c | Graft volume                                                                  | Vehicle (n=10); E11.5 (n=10); E12.5 (n=10), E13.5 (n=7)                | Ordinary one-way ANOVA with Tukey's multiple comparisons test                                   | F (2, 24) = 1.255, P = 0.3032<br>No significant differences among groups                                                                                                         |
| 6d | Graft neuronal density                                                        | Vehicle (n=10); E11.5 (n=10); E12.5 (n=10), E13.5 (n=7)                | Ordinary one-way ANOVA with Tukey's multiple comparisons test                                   | F (2, 24) = 0.3020, P = 0.7421<br>No significant differences among groups                                                                                                        |
| 6e | Basso Mouse Scale open field locomotor scores                                 | Vehicle (n=10); E11.5 (n=10); E12.5 (n=10), E13.5 (n=7)                | Two-way repeated measures ANOVA                                                                 | Time x Treatment main effect: F (21, 231) = 1.4884, P = 0.051                                                                                                                    |
| 6f | Hargreaves scores                                                             | Vehicle (n=10); E11.5 (n=8); E12.5 (n=10), E13.5 (n=5)                 | Repeated measures ANOVA with animals missing scores on day 14 deleted (for all 4 groups and for | All four groups:<br>Time x Treatment main effect: F (21, 203) = 2.599, P = 0.0004<br>Three transplanted groups:<br>Time x Treatment main effect: F (14, 126) = 2.382, P = 0.0056 |

|     |                                                         |                                                                        | the 3 transplanted groups only)                               |                                                                                                                                      |
|-----|---------------------------------------------------------|------------------------------------------------------------------------|---------------------------------------------------------------|--------------------------------------------------------------------------------------------------------------------------------------|
| S3c | Graft Bhlhb5 <sup>+</sup> cell density                  | E11.5 (n=11); E12.5 (n=16); E13.5 (n=16); dorsal (n=12); ventral (n=8) | Ordinary one-way ANOVA with Tukey's multiple comparisons test | F (4, 58) = 3.485; P = 0.0128<br><br>E11.5 vs. dorsal: P = 0.0365<br>E12.5 vs. dorsal: P = 0.0224                                    |
| S3f | Graft Calb <sup>+</sup> /Parv <sup>-</sup> cell density | E11.5 (n=11); E12.5 (n=16); E13.5 (n=16); dorsal (n=12); ventral (n=8) | Ordinary one-way ANOVA with Tukey's multiple comparisons test | F (4, 58) = 6.374; P = 0.0003<br><br>E12.5 vs. dorsal: P = 0.0203<br>E13.5 vs. ventral: P = 0.0027<br>Dorsal vs. ventral: P = 0.0007 |
| S3i | Graft Calb <sup>-</sup> /Parv <sup>+</sup> cell density | E11.5 (n=11); E12.5 (n=16); E13.5 (n=16); dorsal (n=12); ventral (n=8) | Ordinary one-way ANOVA with Tukey's multiple comparisons test | F (4, 58) = 2.045; P = 0.0999<br><br>No significant differences among groups                                                         |
| S3l | Graft Renshaw cell density                              | E11.5 (n=11); E12.5 (n=16); E13.5 (n=16); dorsal (n=12); ventral (n=8) | Ordinary one-way ANOVA with Tukey's multiple comparisons test | F (4, 58) = 3.082; P = 0.0227<br><br>No significant differences among groups                                                         |
| S4b | Graft Tlx3 <sup>+</sup> cell density                    | E13 (n=3); E14 (n=3); E15 (n=3)                                        | Ordinary one-way ANOVA with Tukey's multiple comparisons test | F (2, 6) = 32.52; P = 0.0006<br><br>E13 vs. E14: P = 0.0134<br>E13 vs. E15: P = 0.0005<br>E14 vs. E15: P = 0.0195                    |
| S4d | Graft Lbx1 <sup>+</sup> cell density                    | E13 (n=3); E14 (n=3); E15 (n=3)                                        | Ordinary one-way ANOVA with Tukey's multiple comparisons test | F (2, 6) = 7.792; P = 0.0215<br><br>E13 vs. E15: P = 0.0225                                                                          |
| S4f | Graft Foxp2 <sup>+</sup> cell density                   | E13 (n=3); E14 (n=3); E15 (n=3)                                        | Ordinary one-way ANOVA with Tukey's multiple comparisons test | F (2, 6) = 1.679; P = 0.2635<br><br>No significant differences among groups                                                          |
| S4h | Graft Chx10 <sup>+</sup> cell density                   | E13 (n=3); E14 (n=3); E15 (n=3)                                        | Ordinary one-way ANOVA with Tukey's multiple comparisons test | F (2, 6) = 91.63; P < 0.0001<br><br>E13 vs. E14: P < 0.0001<br>E13 vs. E15: P < 0.0001                                               |

### Supplementary References

- 1 Lu, D. C., Niu, T. & Alaynick, W. A. Molecular and cellular development of spinal cord locomotor circuitry. *Frontiers in molecular neuroscience* **8**, 25, doi:10.3389/fnmol.2015.00025 (2015).
- 2 Alaynick, W. A., Jessell, T. M. & Pfaff, S. L. SnapShot: spinal cord development. *Cell* **146**, 178-178 e171, doi:10.1016/j.cell.2011.06.038 (2011).
- 3 Lai, H. C., Seal, R. P. & Johnson, J. E. Making sense out of spinal cord somatosensory development. *Development* **143**, 3434-3448, doi:10.1242/dev.139592 (2016).
- 4 Helms, A. W. & Johnson, J. E. Specification of dorsal spinal cord interneurons. *Curr Opin Neurobiol* **13**, 42-49 (2003).
