# Supplementary material for: Developmental stage of transplanted neural progenitor cells influences anatomical and functional outcomes after spinal cord injury in mice
Source: PubMed Central journal article supplement (PMC10199026; doi:10.1038/s42003-023-04893-0), 2023-05-19
Supplement: 42003_2023_4893_MOESM3_ESM.pdf [file 42003_2023_4893_MOESM3_ESM.pdf]

## Description of Additional Supplementary Files

**File name:** Supplementary Movie 1

**Description:** 3D lightsheet image of GFP+ cells (green) and GFP+/NeuN+ cells (red) in the cleared cervical spinal cord at 4 weeks post-grafting.

**File name:** Supplementary Data 1

**Description:** Raw source data for all figures and supplemental figures.
